# Supplementary figures and images for: Hypoexcitability precedes denervation in the large fast-contracting motor units in two unrelated mouse models of ALS
Source: eLife journal article supplement (doi:10.7554/elife.30955), 2018-03-26

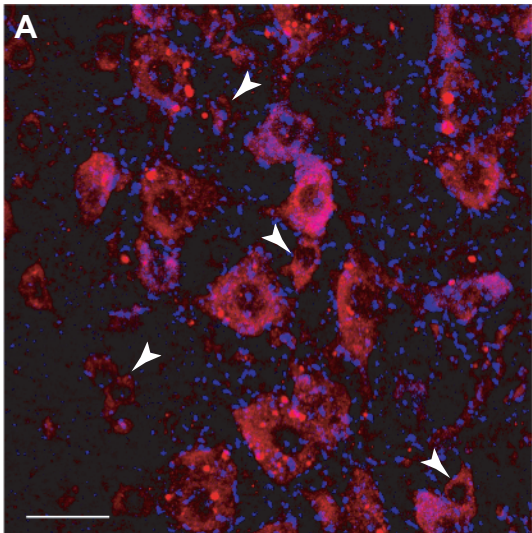

p62 VACHT

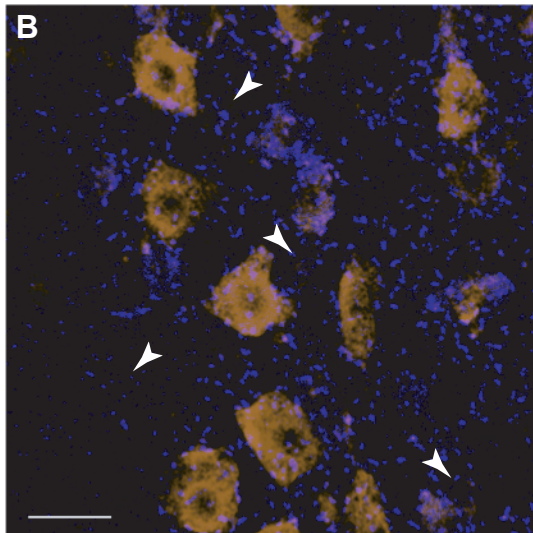

p-eIF2 $\alpha$  VACHT

Supplement: supp [file elife-30955-supp-v1.zip]
